# Supplementary material
Source: PubMed Central journal article supplement (PMC4178600)
Supplement: AEM.01537-14_zam999105630so1.pdf [file AEM.01537-14_zam999105630so1.pdf]

## Supplementary Figure 1

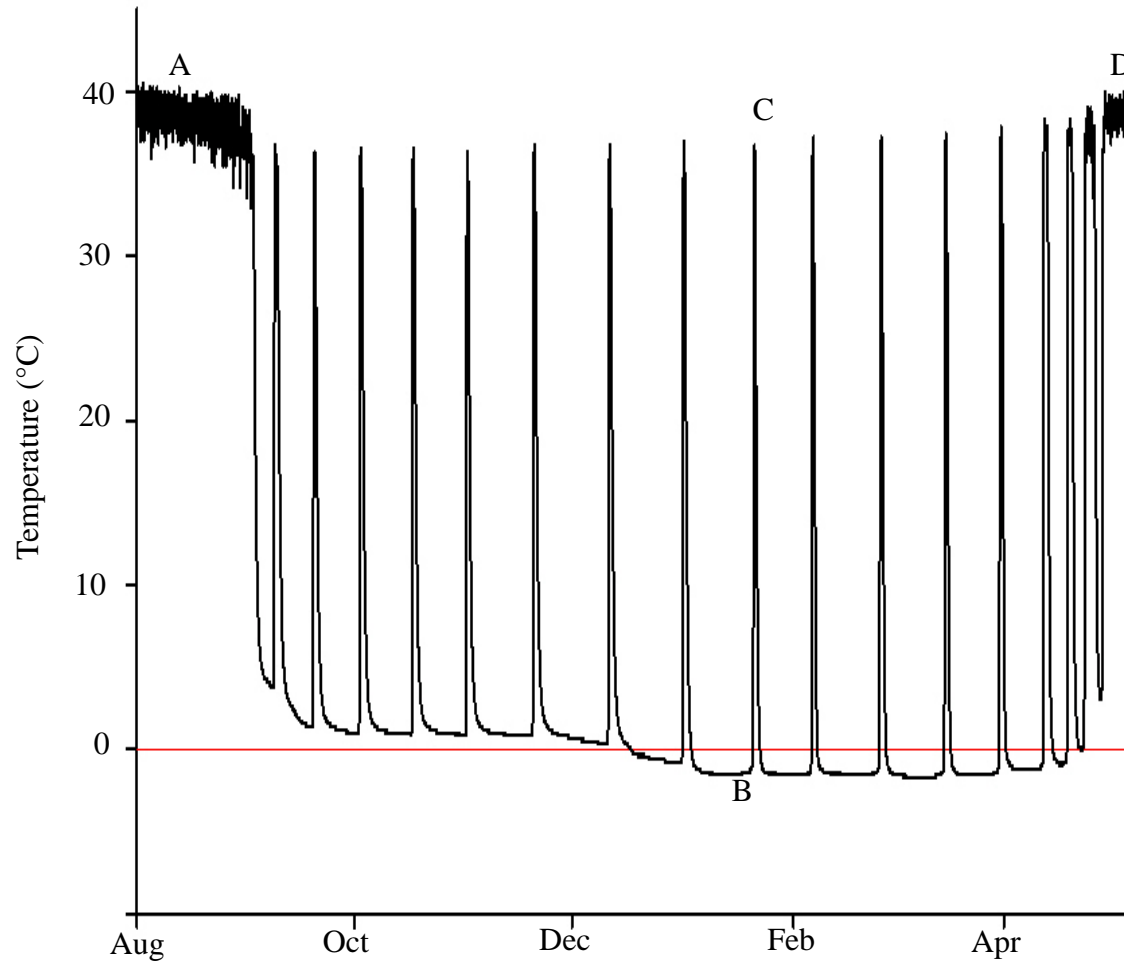

**Supplementary Figure 1.** Sample Design. Animals were sampled at four sample periods across hibernation. A) Summer, B) Late Torpor, C) Late IBA and D) Post-hibernation. The data are the body temperature trace of a female arctic ground squirrel from: **Williams CT, Goropashnaya AV, Buck CL, Fedorov VB, Kohl F, Lee TN, Barnes BM.** 2011. Hibernating above the permafrost: effects of ambient temperature and season on expression of metabolic genes in liver and brown adipose tissue of arctic ground squirrels. *J. Exp. Biol.* **214(8)**:1300-1306 (with permission from C.T. Williams).

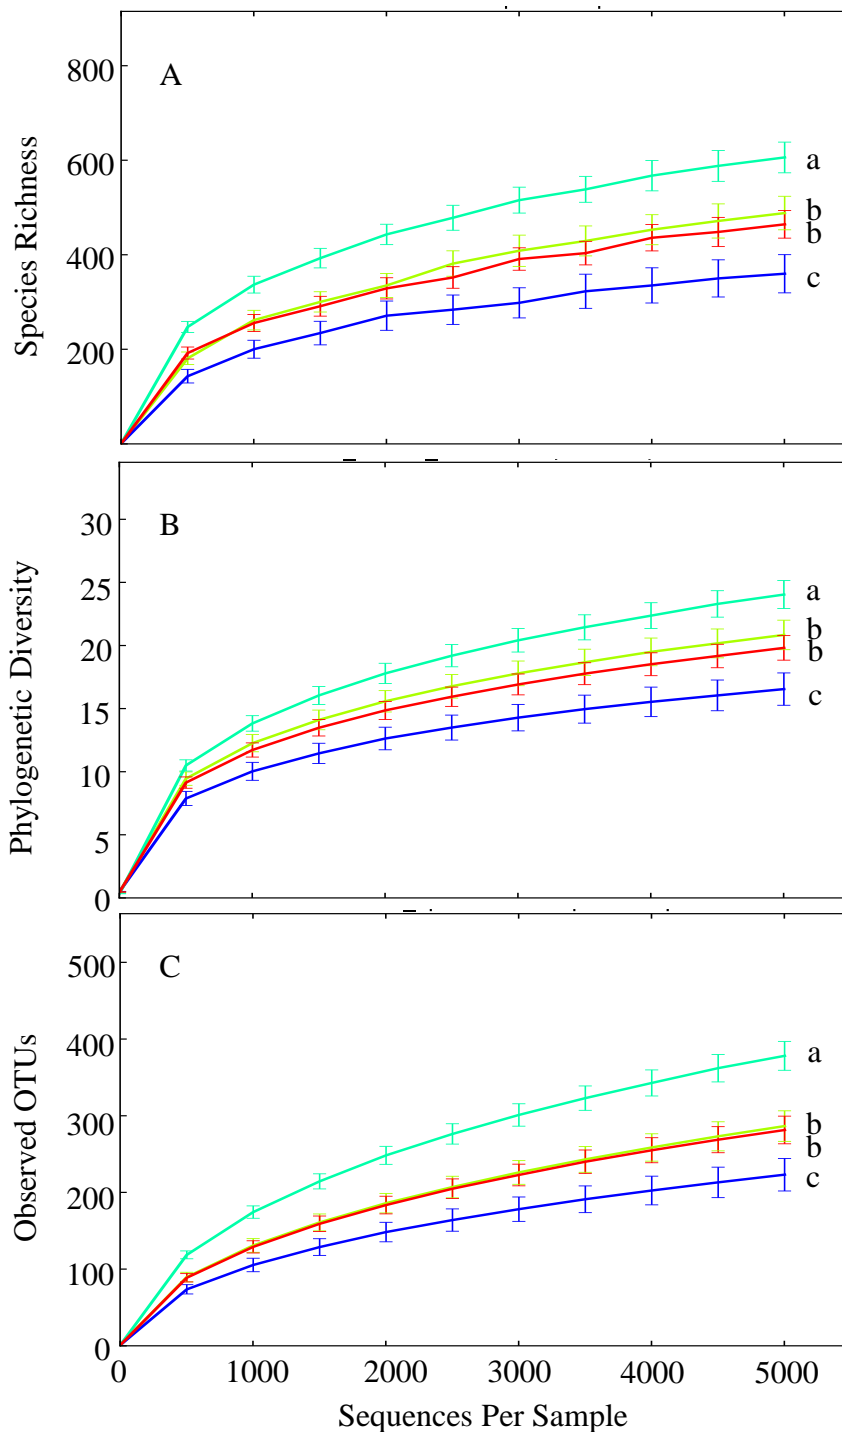

**Supplementary Figure 2.** Rarefaction curves of cecal microbial communities. A) Chao1 metric, B) Observed species metric and C) PD whole metric. Each line represents a sample point and each point is the mean  $\pm$  the standard error. Significant differences are denoted by different letters. Symbols are: Summer (teal;  $n=12$ ), Late Torpor (green;  $n=11$ ), Late IBA (red;  $n=11$ ) and Post-Hibernation (blue;  $n=10$ ). Rarefaction plots were produced in QIIME 1.6.0.

Supplementary Figure 3

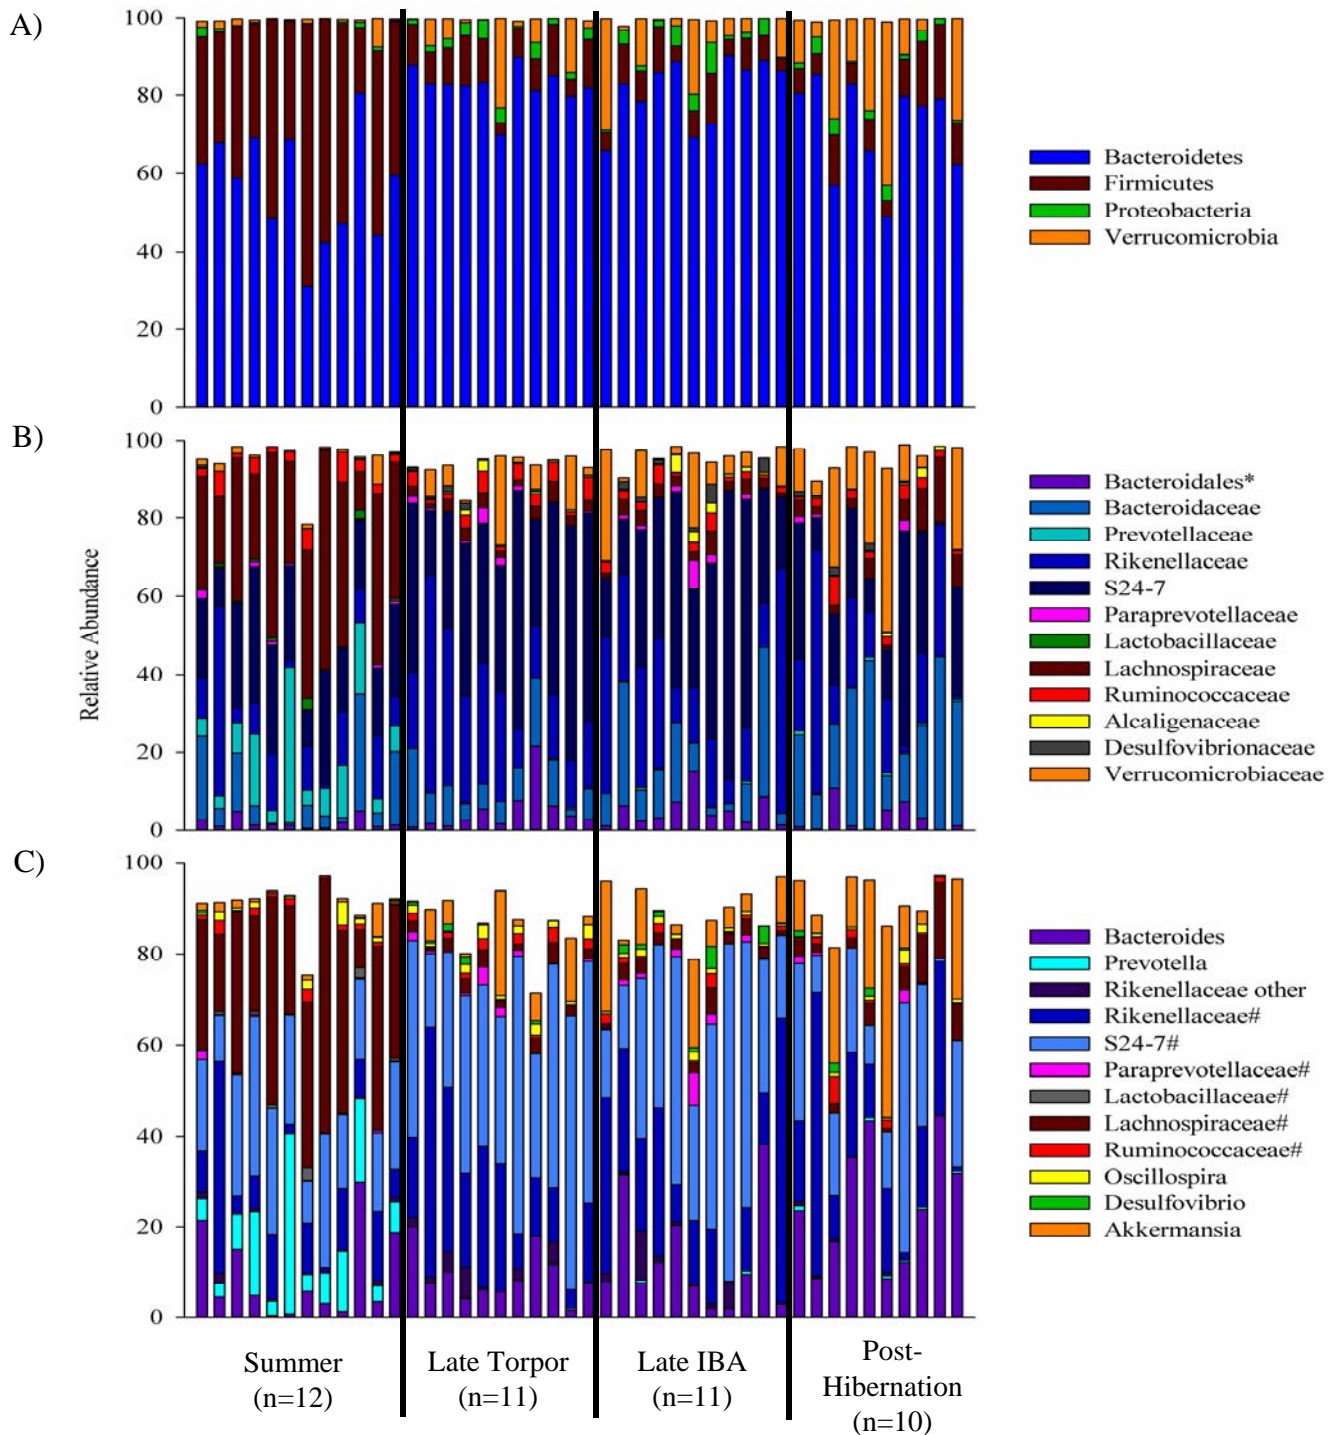

**Supplementary Figure 3.** The relative abundance of dominant taxa per sample period per animal. Unclassified family (\*) or genus (#) within a taxonomic group. Taxa with less than 1% relative abundance.

Supplementary Table 1: Rarefaction Analysis.

| Sample Period    | Samples Sequenced (N) | Average Sequences Passed Quality Check | Minimum Sequences After Quality Check | Observed Species (97%)* | PD Whole Tree* | Chao1*   |
|------------------|-----------------------|----------------------------------------|---------------------------------------|-------------------------|----------------|----------|
| Summer           | 12                    | 13119 ± 703                            | 10973                                 | 362 ± 19                | 24.03 ± 1.11   | 606 ± 32 |
| Late Torpor      | 11                    | 13846 ± 906                            | 10486                                 | 286 ± 20                | 20.84 ± 1.17   | 488 ± 35 |
| Late IBA         | 11                    | 14399 ± 980                            | 8757                                  | 281 ± 18                | 19.81 ± 0.97   | 464 ± 29 |
| Post-Hibernation | 10                    | 13444 ± 1636                           | 5858                                  | 223 ± 21                | 16.54 ± 1.28   | 360 ± 40 |

Values are the mean ± the standard error of the mean

\*Rarefaction values are based on a subsampling of 5001 sequences

Supplementary Table 2: The relative abundances of taxa that significantly differed among sample periods

| Level  | Taxonomy            | Summer Active<br>(n=12)  | Late Torpor<br>(n=11)    | Late IBA<br>(n=11)       | Post-Hibernation<br>(n=10) |
|--------|---------------------|--------------------------|--------------------------|--------------------------|----------------------------|
| Phylum | Bactroidetes        | 56.0 ± 4.1 <sup>a</sup>  | 82.4 ± 1.5 <sup>b</sup>  | 81.5 ± 2.6 <sup>b</sup>  | 72.9 ± 3.9 <sup>a</sup>    |
|        | Firmicutes          | 40.9 ± 4.1 <sup>a</sup>  | 9.20 ± 1.0 <sup>b</sup>  | 7.35 ± 0.1 <sup>b</sup>  | 9.86 ± 1.6 <sup>b</sup>    |
|        | Proteobacteria      | 0.63 ± 0.2 <sup>a</sup>  | 2.59 ± 1.0 <sup>b</sup>  | 2.88 ± 0.7 <sup>b</sup>  | 2.26 ± 0.5 <sup>b</sup>    |
|        | Verrucomicrobia     | 1.37 ± 0.6 <sup>a</sup>  | 5.43 ± 2.1 <sup>a</sup>  | 8.76 ± 2.9 <sup>b</sup>  | 15.6 ± 4.2 <sup>b</sup>    |
| Class  | Bacteroidia         | 56.7 ± 4.1 <sup>a</sup>  | 82.4 ± 1.5 <sup>b</sup>  | 81.0 ± 2.6 <sup>b</sup>  | 71.9 ± 3.9 <sup>a</sup>    |
|        | Clostridia          | 37.6 ± 3.6 <sup>a</sup>  | 7.46 ± 0.8 <sup>b</sup>  | 6.00 ± 0.8 <sup>b</sup>  | 8.9 ± 1.5 <sup>b</sup>     |
|        | Bacilli             | 0.98 ± 0.3 <sup>a</sup>  | 0.06 ± 0.02 <sup>b</sup> | 0.03 ± 0.01 <sup>b</sup> | 0.01 ± 0.01 <sup>b</sup>   |
|        | Betaproteobacteria  | 0.04 ± 0.01 <sup>a</sup> | 0.73 ± 0.23 <sup>b</sup> | 1.35 ± 0.45 <sup>b</sup> | 0.65 ± 0.23 <sup>b</sup>   |
|        | Deltaproteobacteria | 0.11 ± 0.05 <sup>a</sup> | 0.53 ± 0.19 <sup>a</sup> | 1.42 ± 0.5 <sup>b</sup>  | 0.62 ± 0.26 <sup>a</sup>   |
|        | Erysipelotrichi     | 0.03 ± 0.01 <sup>a</sup> | 0.12 ± 0.03 <sup>b</sup> | 0.28 ± 0.08 <sup>b</sup> | 0.11 ± 0.01 <sup>a</sup>   |
|        | Verrucomicrobiae    | 1.37 ± 0.6 <sup>a</sup>  | 5.41 ± 2.1 <sup>a</sup>  | 8.76 ± 2.9 <sup>b</sup>  | 15.6 ± 4.2 <sup>b</sup>    |
| Order  | Bacteroidales       | 56.7 ± 4.1 <sup>a</sup>  | 82.4 ± 1.5 <sup>b</sup>  | 81.5 ± 2.6 <sup>b</sup>  | 71.9 ± 3.9 <sup>a</sup>    |
|        | Clostridiales       | 38.2 ± 4.4 <sup>a</sup>  | 7.1 ± 0.9 <sup>b</sup>   | 5.6 ± 0.77 <sup>b</sup>  | 9.1 ± 2.3 <sup>b</sup>     |
|        | Lactrobacillales    | 0.95 ± 0.3 <sup>a</sup>  | 0.05 ± 0.01 <sup>b</sup> | 0.02 ± 0.01 <sup>b</sup> | 0.0 ± 0.0 <sup>b</sup>     |
|        | Burkholderiales     | 0.03 ± 0.01 <sup>a</sup> | 0.73 ± 0.23 <sup>b</sup> | 1.23 ± 0.45 <sup>b</sup> | 0.22 ± 0.22 <sup>b</sup>   |
|        | Desulfovibrionales  | 0.11 ± 0.05 <sup>a</sup> | 0.52 ± 0.19 <sup>a</sup> | 1.3 ± 0.5 <sup>b</sup>   | 0.63 ± 0.26 <sup>a</sup>   |
|        | Erysipelotrichales  | 0.03 ± 0.01 <sup>a</sup> | 0.12 ± 0.03 <sup>b</sup> | 0.24 ± 0.08 <sup>a</sup> | 0.11 ± 0.06 <sup>b</sup>   |

|        |                               |                   |                   |                   |                   |
|--------|-------------------------------|-------------------|-------------------|-------------------|-------------------|
|        | Verrucomicrobiales            | $1.37 \pm 0.6^a$  | $5.41 \pm 2.2^a$  | $8.76 \pm 2.9^b$  | $15.6 \pm 4.2^b$  |
| Family | Bacteroidaceae                | $9.11 \pm 2.8^a$  | $9.21 \pm 1.7^a$  | $12.9 \pm 3.7^a$  | $24.9 \pm 4.2^b$  |
|        | Bacteroidales*                | $1.93 \pm 0.43^a$ | $5.03 \pm 1.8^b$  | $5.13 \pm 1.2^b$  | $3.02 \pm 1.13^a$ |
|        | Prevotellaceae                | $10.8 \pm 3.1^a$  | $0.15 \pm 0.05^b$ | $0.24 \pm 0.08^b$ | $0.46 \pm 0.12^b$ |
|        | Rikenellaceae                 | $12.2 \pm 3.6^a$  | $24.8 \pm 4.2^b$  | $24.2 \pm 5.1^a$  | $19.9 \pm 5.7^a$  |
|        | S24-7                         | $21.38 \pm 2.2^a$ | $40.58 \pm 4.3^b$ | $36.40 \pm 5.8^b$ | $21.95 \pm 5.7^a$ |
|        | Lachnospiraceae               | $33.6 \pm 3.8^a$  | $2.87 \pm 0.37^b$ | $2.96 \pm 0.43^b$ | $5.72 \pm 1.6^b$  |
|        | Lactobacillaceae              | $0.73 \pm 0.3^a$  | $0.00 \pm 0.0^b$  | $0.00 \pm 0.0^b$  | $0.00 \pm 0.0^b$  |
|        | Clostridiales*                | $0.13 \pm 0.05^a$ | $0.00 \pm 0.0^b$  | $0.01 \pm 0.01^b$ | $0.02 \pm 0.01^b$ |
|        | Clostridiaceae                | $0.05 \pm 0.3^a$  | $0.00 \pm 0.0^b$  | $0.15 \pm 0.04^c$ | $0.06 \pm 0.02^a$ |
|        | Burkholderiaceae              | $0.04 \pm 0.01^a$ | $0.55 \pm 0.17^b$ | $0.95 \pm 0.34^b$ | $0.60 \pm 0.19^b$ |
|        | Alcaligenaceae                | $0.03 \pm 0.01^a$ | $0.7 \pm 0.23^b$  | $1.22 \pm 0.44$   | $0.64 \pm 0.22^b$ |
|        | Odoribacteraceae              | $0.06 \pm 0.02^a$ | $0.85 \pm 0.2^b$  | $0.71 \pm 0.21^b$ | $0.78 \pm 0.40^b$ |
|        | Desulfovibrionaceae           | $0.11 \pm 0.05^a$ | $0.01 \pm 0.1^a$  | $1.3 \pm 0.5^b$   | $0.63 \pm 0.26^a$ |
|        | Verrucomicrobiaceae           | $1.37 \pm 0.6^a$  | $5.41 \pm 2.2^a$  | $8.76 \pm 2.9^b$  | $15.6 \pm 4.2^b$  |
| Genus  | Bacteroides                   | $9.11 \pm 2.8^a$  | $9.21 \pm 1.7^a$  | $12.9 \pm 3.7^a$  | $24.9 \pm 4.2^b$  |
|        | Prevotella                    | $10.8 \pm 3.1^a$  | $0.14 \pm 0.05^b$ | $0.24 \pm 0.08^b$ | $0.46 \pm 0.11^b$ |
|        | Rikenellaceae <sup>#</sup>    | $11.5 \pm 3.45^a$ | $22.1 \pm 4.4^b$  | $22.3 \pm 5.2^b$  | $19.7 \pm 5.7^a$  |
|        | S24-7 <sup>#</sup>            | $21.38 \pm 2.2^a$ | $40.58 \pm 4.3^b$ | $36.40 \pm 5.8^b$ | $21.95 \pm 5.7^a$ |
|        | Odoribacter                   | $0.06 \pm 0.02^a$ | $0.85 \pm 0.12^b$ | $0.72 \pm 0.22^b$ | $0.78 \pm 0.4^a$  |
|        | Lachnospiraceae <sup>#</sup>  | $30.0 \pm 4.0^a$  | $1.60 \pm 0.25^b$ | $1.63 \pm 0.23^b$ | $4.26 \pm 1.5^b$  |
|        | Lactobacillaceae <sup>#</sup> | $0.71 \pm 0.25^a$ | $0.03 \pm 0.02^b$ | $0.00 \pm 0.0^b$  | $0.00 \pm 0.0^b$  |

|                              |                          |                            |                          |                          |
|------------------------------|--------------------------|----------------------------|--------------------------|--------------------------|
| Roseburia                    | 2.43 ± 0.78 <sup>a</sup> | 0.03 ± 0.01 <sup>b</sup>   | 0.10 ± 0.04 <sup>b</sup> | 0.03 ± 0.01 <sup>b</sup> |
| Ruminococcus                 | 0.69 ± 0.12 <sup>a</sup> | 0.11 ± 0.05 <sup>b</sup>   | 0.17 ± 0.01 <sup>b</sup> | 0.13 ± 0.06 <sup>b</sup> |
| Clostridiaceae <sup>#</sup>  | 0.01 ± 0.00 <sup>a</sup> | 0.18 ± 0.04 <sup>b,c</sup> | 0.14 ± 0.04 <sup>b</sup> | 4.26 ± 1.5 <sup>b</sup>  |
| Blautia                      | 0.41 ± 0.1 <sup>a</sup>  | 0.07 ± 0.22 <sup>b</sup>   | 0.1 ± 0.05 <sup>b</sup>  | 0.05 ± 0.02 <sup>b</sup> |
| Lachnospiraceae <sup>#</sup> | 30.0 ± 4.0 <sup>a</sup>  | 1.60 ± 0.25 <sup>b</sup>   | 1.63 ± 0.23 <sup>b</sup> | 0.06 ± 0.02 <sup>a</sup> |
| Clostridiaceae <sup>#</sup>  | 0.01 ± 0.00 <sup>a</sup> | 0.18 ± 0.04 <sup>a,b</sup> | 0.14 ± 0.04 <sup>b</sup> | 0.00 ± 0.0 <sup>b</sup>  |
| Coprococcus                  | 0.58 ± 0.25 <sup>a</sup> | 0.03 ± 0.13 <sup>b</sup>   | 0.06 ± 0.02 <sup>b</sup> | 0.03 ± 0.02 <sup>b</sup> |
| Sutterella                   | 0.04 ± 0.1 <sup>a</sup>  | 0.72 ± 0.22 <sup>b</sup>   | 1.22 ± 0.45 <sup>b</sup> | 0.64 ± 0.22 <sup>b</sup> |
| Desulfovibrio                | 0.09 ± 0.05 <sup>a</sup> | 0.5 ± 0.19 <sup>a</sup>    | 1.28 ± 0.5 <sup>b</sup>  | 0.60 ± 0.26 <sup>a</sup> |
| Akkermansia                  | 1.37 ± 0.6 <sup>a</sup>  | 5.41 ± 2.2 <sup>a</sup>    | 8.76 ± 2.9 <sup>b</sup>  | 15.6 ± 4.2 <sup>b</sup>  |

---

Values are the mean +/- the standard error of the mean.

Different letters indicate significant differences as determined by a Kruskal-Wallis Rank-Sum test

<sup>#</sup> = unclassified genus

<sup>\*</sup> = unclassified family
